# Supplementary material for: Caves as microrefugia: Pleistocene phylogeography of the troglophilic North American scorpion Pseudouroctonus reddelli
Source: PubMed Central journal article supplement (PMC3902065; doi:10.1186/1471-2148-14-9), 2014-01-16

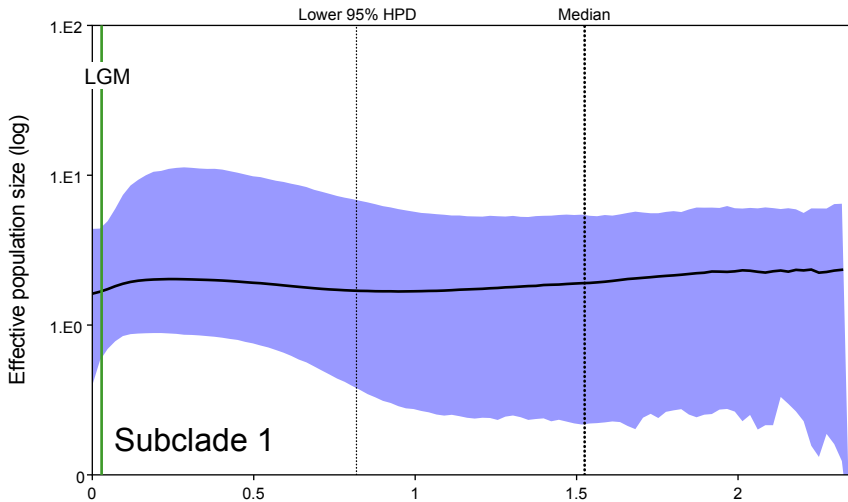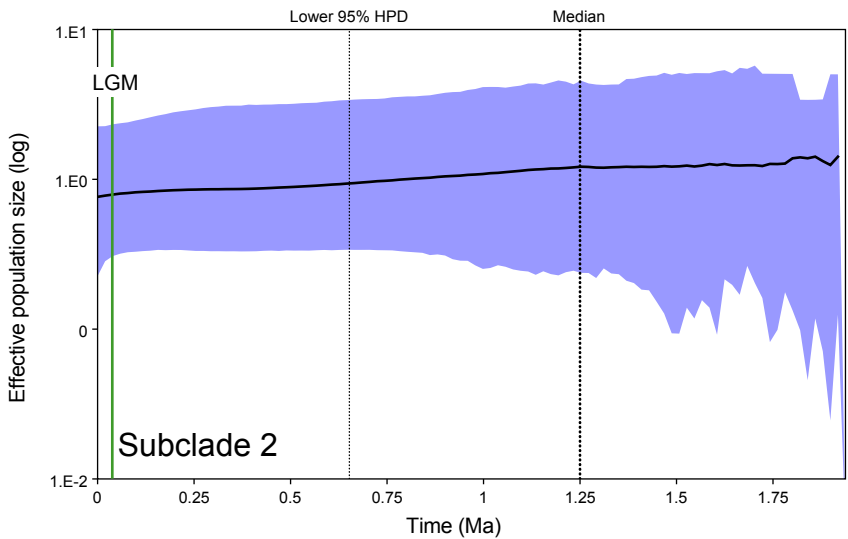

Supplement: 1471-2148-14-9-S3.pdf [file 1471-2148-14-9-S3.pdf]
